# Supplementary material for: Occurrence of Sinonasal Intestinal-Type Adenocarcinoma and Non-Intestinal-Type Adenocarcinoma in Two Countries with Different Patterns of Wood Dust Exposure
Source: MDPI journal article supplement (doi:10.3390/cancers13205245), 2021-10-19
Supplement: s1 [file s1]

# Occurrence of Sinonasal Intestinal-Type Adenocarcinoma and Non-Intestinal-Type Adenocarcinoma in Two Countries with Different Patterns of Wood Dust Exposure

Ilmo Leivo, Reetta Holmila, Daniele Luce, Torben Steiniche, Michael Dictor, Pirjo Heikkilä, Kirsti Husgafvel-Pursiainen and Henrik Wolff

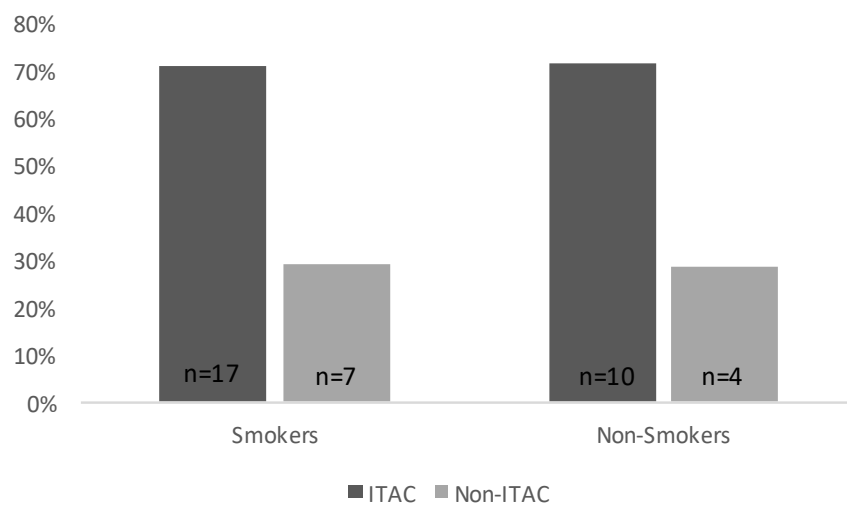

**Figure S1.** Distribution of tumors classified as (IHC) ITAC or (IHC) non-ITAC among smokers and non-smokers. ITAC, intestinal-type adenocarcinoma; IHC, immunohistochemistry.

**Table S1.** Distribution of morphologic types (Barnes classification) in tumors classified in HE staining as (ITACs), and reclassified based on (IHC) as ITACs and non-ITACs.

| Morphologic Type | (IHC) ITAC   | (IHC) non-ITAC |
|------------------|--------------|----------------|
|                  | <i>n</i> (%) | <i>n</i> (%)   |
| Colonic          | 15 (39.5)    | 2 (15.4)       |
| Papillary        | 8 (21.1)     | 3 (23.1)       |
| Mucinous         | 12 (31.6)    | 1 (7.7)        |
| Mixed            | 3 (7.9)      | 2 (15.4)       |
| Solid            | 0 (0)        | 3 (23.1)       |
| Other            | 0 (0)        | 2 (15.4)       |
| Total            | 38 (100)     | 13 (100)       |

IHC, immunohistochemistry; ITAC, intestinal-type adenocarcinoma.

**Table S2.** Association between wood dust exposure and ITACs and non-ITACs in Finland and France classified with HE or IHC.

| Variable           | Finland<br><i>n</i> (%) | France<br><i>n</i> (%) | All<br><i>n</i> (%) |
|--------------------|-------------------------|------------------------|---------------------|
| (HE) ITAC          |                         |                        |                     |
| Wood dust exposure | 11 (68.8)               | 20 (83.3)              | 31 (79.5)           |
| No exposure        | 4 (26.7)                | 4 (16.7)               | 8 (20.5)            |
| (IHC) ITAC         |                         |                        |                     |
| Wood dust exposure | 8 (88.9)                | 19 (86.4)              | 27 (87.1)           |
| No exposure        | 1 (11.1)                | 3 (13.6)               | 4 (12.9)            |
| (HE) non-ITAC      |                         |                        |                     |
| Wood dust exposure | 0 (0)                   | -                      | 0 (0)               |
| No exposure        | 3 (100.0)               | -                      | 3 (100.0)           |
| (IHC) non-ITAC     |                         |                        |                     |
| Wood dust exposure | 3 (33.3)                | 1 (50.0)               | 4 (36.4)            |
| No exposure        | 6 (66.7)                | 1 (50.0)               | 7 (63.6)            |

ITAC, intestinal-type adenocarcinoma; HE, Hematoxylin and Eosin; IHC, immunohistochemistry.

**Table S3.** Ki-67 labeling index in tumors classified as (IHC) ITAC or (IHC) non-ITAC.

| Ki-67  | (IHC) ITAC<br><i>n</i> (%) | (IHC) Non-ITAC<br><i>n</i> (%) |
|--------|----------------------------|--------------------------------|
| <15%   | 4 (10.5)                   | 6 (33.3)                       |
| 15-50% | 18 (47.4)                  | 7 (38.9)                       |
| >50%   | 16 (42.1)                  | 5 (27.8)                       |
| Total  | 38 (100)                   | 18 (100)                       |

ITAC, intestinal-type adenocarcinoma, IHC, immunohistochemistry

**Table S4.** CEA staining in tumors classified as (IHC) ITAC or (IHC) non-ITAC. CEA staining was not available in all tumors.

| Variable          | (IHC) ITAC<br><i>n</i> (%) | (IHC) Non-ITAC<br><i>n</i> (%) |
|-------------------|----------------------------|--------------------------------|
| No CEA            | 3 (8.1)                    | 3 (18.8)                       |
| CEAm and CEAc     | 25 (67.6)                  | 9 (56.3)                       |
| Only CEAm or CEAc | 9 (24.3)                   | 4 (25.0)                       |
| Total             | 37 (100)                   | 16 (100)                       |

ITAC, intestinal-type adenocarcinoma; IHC, immunohistochemistry; CEA, carcino-embryonic antigen. CEAm: membranous staining, CEAc: cytoplasmic staining.
